# Supplementary material for: Participation and Contribution in Crowdsourced Surveys
Source: PLOS journal article supplement (doi:10.1371/journal.pone.0120521), 2015-04-02
Supplement: S1 (10.1371/journal.pone.0120521.s001) [file journal.pone.0120521.s001]

# Supporting Information for: Participation and Contribution in Crowdsourced Surveys

Robert Swain, Alex Berger, Josh Bongard, and Paul Hines

This supporting information file provides screen captures showing various pages from each of the three crowdsourcing sites: Childhood BMI, EnergyMinder, and Personal Finance.

## Childhood BMI

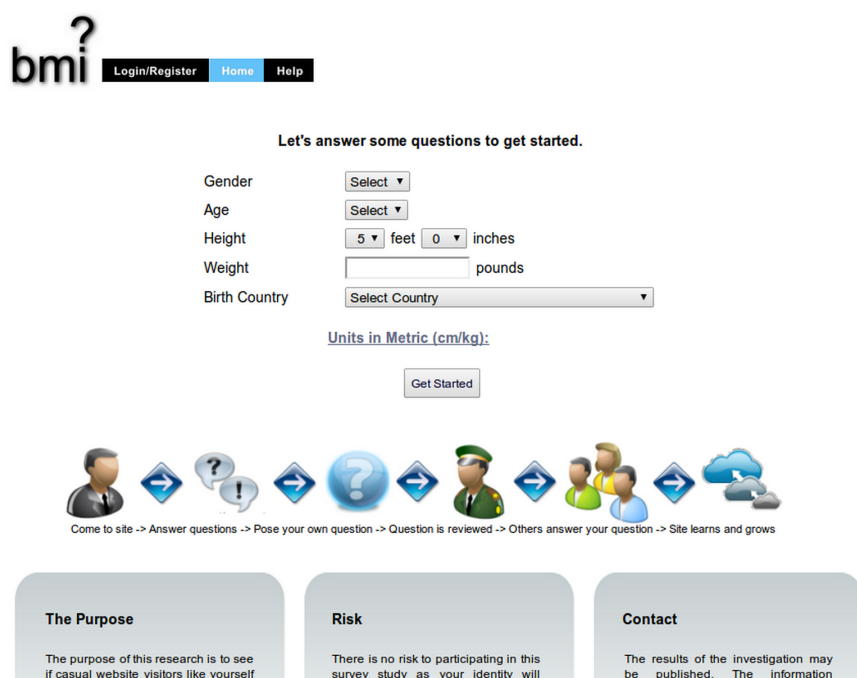

**bmi?** Login/Register Home Help

Let's answer some questions to get started.

Gender

Age

Height  feet  inches

Weight  pounds

Birth Country

[Units in Metric \(cm/kg\):](#)


  
 Come to site -> Answer questions -> Pose your own question -> Question is reviewed -> Others answer your question -> Site learns and grows

**The Purpose**

The purpose of this research is to see if casual website visitors like yourself

**Risk**

There is no risk to participating in this survey study as your identity will

**Contact**

The results of the investigation may be published. The information

Figure A. Landing Page for the Childhood BMI site.

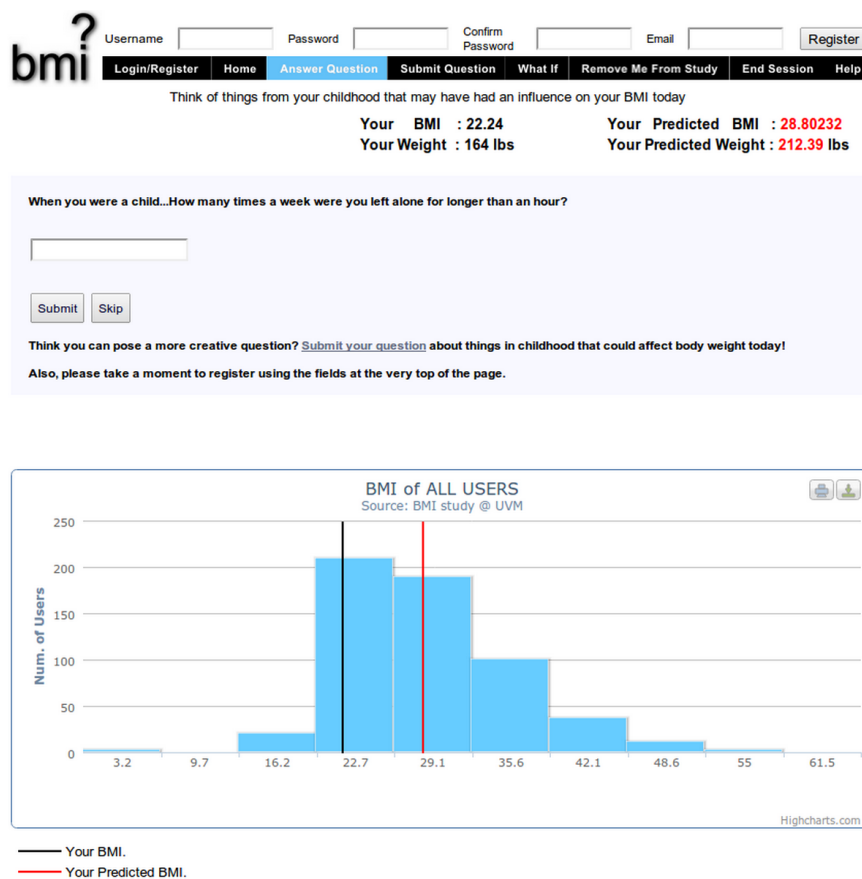

Figure B. Primary Survey Page for the Childhood BMI site.

**bmi?** Username  Password  Confirm Password  Email  [Register](#)

[Login/Register](#) [Home](#) [Answer Question](#) [Submit Question](#) [What If](#) [Remove Me From Study](#) [End Session](#) [Help](#)

Think of things from your childhood that may have had an influence on your BMI today

Your BMI : 22.24      Your Predicted BMI : 28.80232  
Your Weight : 164 lbs      Your Predicted Weight : 212.39 lbs

**What would you like to ask your fellow users?**

When you were a child...

**How should they respond?**

☒ Yes/No ?  
☐ Numeric Entry ?  
☐ Agree/Disagree Scale ?

[Submit](#)

**These questions will be rejected:**

- Offensive questions
- Unintelligible questions
- Self-identifying questions. (e.g -- Hi I am Jim Taylor. Whats your favourite color?)
- Questions directly asking for BMI, height, or weight

**A Good Question**

1. Submit a Question for other users to answer.

**More..**

What childhood events and activities do "YOU" think might influence BMI?

**More..**

What counts as a good question?  
A good question should be-

Figure C. Question Submittal Page for the Childhood BMI site.

## EnergyMinder

**energy • minder** [About](#) [FAQ](#) [Sign In](#) [Register](#)

Energy Minder is an experimental social network designed to answer the question, "What makes one home use more electricity than another?"

**Register**

\* EnergyMinder ID [\(Help me find it\)](#)

\* Email

\* Password

\* Password confirmation

[REGISTER](#)

Already have an account? [Sign in](#)

**Learn More**

Energy Minder Video Tutorial

Asking Good Energy Minder Questions

- Don't ask advice-type questions.

**Good:** Do you use a high-efficiency washing machine?

**Bad:** Would using a high-efficiency washing machine help to save electricity?

Figure D. Landing Page for the EnergyMinder site.

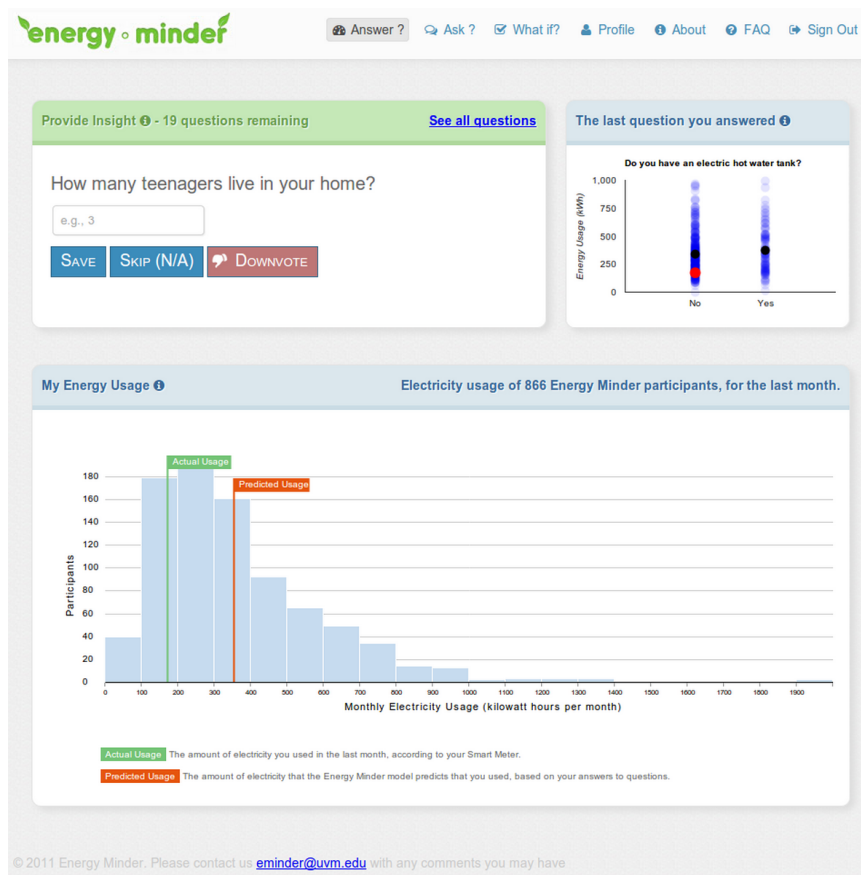

Figure E. Primary Survey Page for the EnergyMinder site.

energy • minder

Answer ? Ask ? What if? Profile About FAQ Sign Out

Ask a Question - Step 1 of 2

Ask a question that will help Energy Minder learn about energy efficiency.

How should people answer this question?

Ask factual questions about homes or lifestyles, rather than opinion or advice questions. For example: "Do you use an electric dryer?" is better than "Should I buy a new dryer?" or "Do electric dryer's waste energy?"

☐ Yes/No (example: Do you use an electric clothes dryer?)
 ☐ Agree/Disagree (example: I have a lot of insulation in my attic.)
 ☐ Number (example: How many loads of laundry do you typically run per week?)

Next

Your Questions

| Description | Approval Status | Answer Count | Rank |
|-------------|-----------------|--------------|------|
|             |                 |              |      |

Figure F. Question Submittal Page for the EnergyMinder site.

## Personal Savings

**Click the link below to start the survey:**

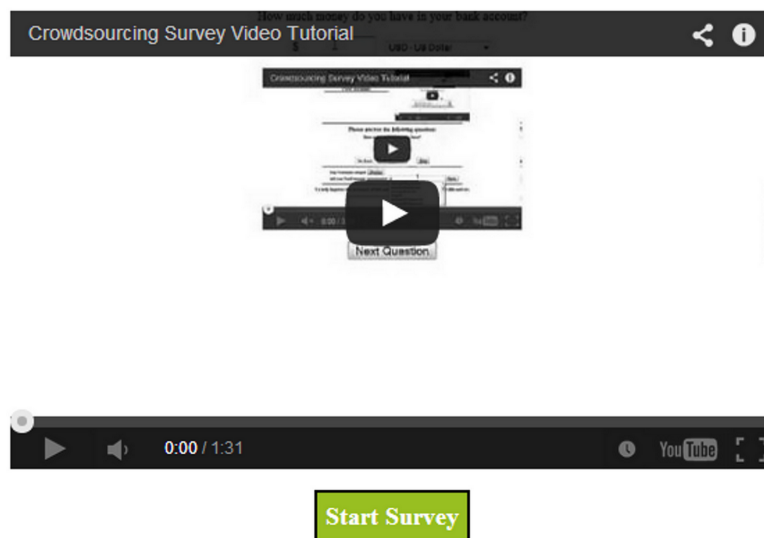

Figure G. Landing Page for the Personal Savings site.

Personal Savings Crowdsourcing Research Survey [Remove me from Survey](#)  
 In order to help us improve this calculator, please answer the following question:

How much money do you have in your bank account?

\$  USD - US Dollar

Crowdsourcing Survey Video Tutorial

0:00 / 1:31

Next Question

Figure H. Second Landing Page for the Personal Savings site.

Personal Savings Crowdsourcing Research Survey [Remove me from Survey](#)

Current Question: 1 of 289 (0% complete)

Computer's Guess: \$43,545  
 Correct Answer: \$6,000  
[Contact Researchers](#)

Crowdsourcing Survey Video Tutorial

0:00 / 1:31

Please answer the following question:

Do you consider yourself to be more frugal than most of your friends?

☐ yes  
☐ no

Go Back Skip Next Question

Create Username [\(strongly recommended\)](#):  Save

Add your Email [\(strongly recommended\)](#):  Save

To help improve the accuracy of this calculator, please add a question to this survey:

Add Question to Survey

Figure I. Primary Survey Page for the Personal Savings site.
